# Supplementary material for: Horizontal variability of aerosol optical depth observed during the ARCTAS airborne experiment
Source: Copernicus journal article supplement (doi:10.5194/acp-11-8489-2011), 2011-08-19
Supplement: Supplementary file 1 [file acp-11-8489-2011-supplement.zip]

Supplementary Table 1.  $std_{rel,med}$  of AOD,  $std_{med}$  of Angstrom exponent and  $r$  of both, for the Alaska (top table) and Canada (bottom) phases.

| Alaska              | $std_{rel}$ or $std$ |                      |                      |                      |                      |                      |                      | $r$   |      |      |      |       |       |         |
|---------------------|----------------------|----------------------|----------------------|----------------------|----------------------|----------------------|----------------------|-------|------|------|------|-------|-------|---------|
|                     | cons.                | 1 km                 | 3 km                 | 6 km                 | 10 km                | 20 km                | 35.2 km              | cons. | 1 km | 3 km | 6 km | 10 km | 20 km | 35.2 km |
| AOD at 354 nm       | 0.2%<br>(0.0%-0.5%)  | 0.3%<br>(0.0%-0.7%)  | 0.6%<br>(0.3%-1.2%)  | 0.8%<br>(0.4%-1.6%)  | 1.0%<br>(0.5%-2.0 %) | 1.2%<br>(0.7%-3.4 %) | 1.5%<br>(1.0%-4.2 %) | 1.00  | 1.00 | 1.00 | 0.99 | 0.99  | 0.97  | 0.95    |
| AOD at 380 nm       | 0.3%<br>(0.0%-0.7%)  | 0.3%<br>(0.0%-0.8%)  | 0.7%<br>(0.3%-1.4%)  | 1.1%<br>(0.5%-2.0%)  | 1.3%<br>(0.7%-2.6 %) | 1.9%<br>(1.1%-3.8 %) | 2.8%<br>(1.5%-5.6 %) | 1.00  | 1.00 | 1.00 | 0.99 | 0.98  | 0.95  | 0.93    |
| AOD at 451 nm       | 0.3%<br>(0.0%-0.7%)  | 0.3%<br>(0.0%-0.8%)  | 0.7%<br>(0.3%-1.5%)  | 1.1%<br>(0.5%-2.2%)  | 1.4%<br>(0.8%-2.8 %) | 2.1%<br>(1.1%-4.5 %) | 3.1%<br>(1.6%-6.0 %) | 1.00  | 1.00 | 0.99 | 0.98 | 0.97  | 0.92  | 0.89    |
| AOD at 499 nm       | 0.3%<br>(0.0%-0.7%)  | 0.3%<br>(0.0%-0.8%)  | 0.7%<br>(0.3%-1.3%)  | 1.1%<br>(0.5%-2.2%)  | 1.3%<br>(0.7%-2.3 %) | 1.9%<br>(1.0%-3.1 %) | 2.5%<br>(1.5%-5.3 %) | 1.00  | 1.00 | 1.00 | 0.99 | 0.98  | 0.95  | 0.92    |
| AOD at 520 nm       | 0.3%<br>(0.0%-0.8%)  | 0.3%<br>(0.0%-0.9%)  | 0.8%<br>(0.3%-1.6%)  | 1.2%<br>(0.6%-2.5%)  | 1.5%<br>(0.8%-3.1 %) | 2.2%<br>(1.2%-4.8 %) | 3.2%<br>(1.6%-6.3 %) | 1.00  | 1.00 | 0.99 | 0.98 | 0.96  | 0.91  | 0.88    |
| AOD at 606 nm       | 0.3%<br>(0.0%-0.7%)  | 0.4%<br>(0.0%-0.8%)  | 0.7%<br>(0.3%-1.5%)  | 1.2%<br>(0.6%-2.4%)  | 1.5%<br>(0.7%-2.6 %) | 2.1%<br>(1.1%-4.5 %) | 2.9%<br>(1.6%-6.3 %) | 1.00  | 1.00 | 0.99 | 0.98 | 0.97  | 0.92  | 0.89    |
| AOD at 675 nm       | 0.3%<br>(0.0%-0.8%)  | 0.4%<br>(0.0%-0.9%)  | 0.8%<br>(0.3%-1.7%)  | 1.3%<br>(0.6%-2.7%)  | 1.6%<br>(0.8%-2.9 %) | 2.4%<br>(1.2%-5.1 %) | 3.2%<br>(1.8%-7.2 %) | 1.00  | 1.00 | 0.99 | 0.97 | 0.96  | 0.90  | 0.86    |
| AOD at 779 nm       | 0.4%<br>(0.0%-0.9%)  | 0.4%<br>(0.2%-1.0%)  | 0.8%<br>(0.4%-1.9%)  | 1.3%<br>(0.6%-2.8%)  | 1.7%<br>(0.8%-3.3 %) | 2.6%<br>(1.3%-6.6 %) | 3.5%<br>(1.8%-7.4 %) | 1.00  | 1.00 | 0.98 | 0.96 | 0.93  | 0.84  | 0.81    |
| AOD at 865 nm       | 0.4%<br>(0.0%-1.1%)  | 0.5%<br>(0.2%-1.2%)  | 0.9%<br>(0.4%-2.3%)  | 1.5%<br>(0.7%-3.7%)  | 2.0%<br>(0.9%-4.4 %) | 3.0%<br>(1.4%-7.6 %) | 4.2%<br>(2.0%-8.2 %) | 1.00  | 0.99 | 0.98 | 0.95 | 0.92  | 0.83  | 0.77    |
| AOD at 1019 nm      | 0.5%<br>(0.0%-1.3%)  | 1.0%<br>(0.2%-1.3%)  | 1.6%<br>(0.4%-2.8%)  | 2.4%<br>(0.7%-4.5%)  | 3.4%<br>(0.9%-5.6 %) | 4.3%<br>(1.5%-10.2%) | 4.3%<br>(2.0%-10.2%) | 1.00  | 0.99 | 0.96 | 0.93 | 0.89  | 0.76  | 0.70    |
| AOD at 1241 nm      | 0.4%<br>(0.0%-1.0%)  | 0.5%<br>(0.2%-1.1%)  | 0.8%<br>(0.4%-2.1%)  | 1.2%<br>(0.6%-3.3%)  | 1.4%<br>(0.7%-3.4 %) | 2.4%<br>(1.1%-5.9 %) | 3.3%<br>(1.4%-8.4 %) | 1.00  | 0.99 | 0.97 | 0.92 | 0.90  | 0.76  | 0.72    |
| AOD at 1559 nm      | 1.0%<br>(0.3%-2.6%)  | 1.0%<br>(0.4%-2.7%)  | 1.7%<br>(0.8%-4.9%)  | 2.4%<br>(1.1%-7.2%)  | 2.8%<br>(1.3%-9.4 %) | 4.0%<br>(1.7%-15.6%) | 4.7%<br>(2.4%-13.5%) | 0.99  | 0.98 | 0.92 | 0.84 | 0.81  | 0.66  | 0.58    |
| AOD at 2139 nm      | 0.6%<br>(0.0%-2.2%)  | 0.7%<br>(0.3%-2.2%)  | 1.3%<br>(0.6%-4.8%)  | 2.0%<br>(0.8%-8.0%)  | 2.3%<br>(0.9%-10.3%) | 3.5%<br>(1.4%-16.7%) | 3.9%<br>(2.0%-16.0%) | 0.99  | 0.98 | 0.90 | 0.77 | 0.75  | 0.58  | 0.47    |
| Column Å at 354 nm  | 0.017<br>(0.0 -0.1 ) | 0.030<br>(0.0 -0.1 ) | 0.048<br>(0.0 -0.1 ) | 0.057<br>(0.0 -0.1 ) | 0.054<br>(0.0 -0.1 ) | 0.058<br>(0.0 -0.1 ) | 0.059<br>(0.0 -0.1 ) | 0.97  | 0.97 | 0.97 | 0.96 | 0.94  | 0.92  | 0.92    |
| Column Å at 380 nm  | 0.016<br>(0.0 -0.1 ) | 0.028<br>(0.0 -0.1 ) | 0.045<br>(0.0 -0.1 ) | 0.053<br>(0.0 -0.1 ) | 0.051<br>(0.0 -0.1 ) | 0.054<br>(0.0 -0.1 ) | 0.056<br>(0.0 -0.1 ) | 0.98  | 0.97 | 0.97 | 0.96 | 0.94  | 0.92  | 0.92    |
| Column Å at 451 nm  | 0.014<br>(0.0 -0.1 ) | 0.023<br>(0.0 -0.1 ) | 0.038<br>(0.0 -0.1 ) | 0.045<br>(0.0 -0.1 ) | 0.043<br>(0.0 -0.1 ) | 0.047<br>(0.0 -0.1 ) | 0.049<br>(0.0 -0.1 ) | 0.98  | 0.98 | 0.98 | 0.96 | 0.94  | 0.92  | 0.92    |
| Column Å at 499 nm  | 0.012<br>(0.0 -0.1 ) | 0.020<br>(0.0 -0.1 ) | 0.034<br>(0.0 -0.1 ) | 0.041<br>(0.0 -0.1 ) | 0.038<br>(0.0 -0.1 ) | 0.042<br>(0.0 -0.1 ) | 0.045<br>(0.0 -0.1 ) | 0.98  | 0.98 | 0.98 | 0.96 | 0.94  | 0.91  | 0.92    |
| Column Å at 520 nm  | 0.012<br>(0.0 -0.1 ) | 0.019<br>(0.0 -0.1 ) | 0.033<br>(0.0 -0.1 ) | 0.039<br>(0.0 -0.1 ) | 0.036<br>(0.0 -0.1 ) | 0.040<br>(0.0 -0.1 ) | 0.043<br>(0.0 -0.1 ) | 0.98  | 0.98 | 0.98 | 0.96 | 0.94  | 0.91  | 0.91    |
| Column Å at 606 nm  | 0.010<br>(0.0 -0.0 ) | 0.016<br>(0.0 -0.0 ) | 0.027<br>(0.0 -0.0 ) | 0.033<br>(0.0 -0.0 ) | 0.030<br>(0.0 -0.1 ) | 0.034<br>(0.0 -0.1 ) | 0.036<br>(0.0 -0.1 ) | 0.99  | 0.98 | 0.98 | 0.96 | 0.94  | 0.91  | 0.91    |
| Column Å at 675 nm  | 0.009<br>(0.0 -0.0 ) | 0.014<br>(0.0 -0.0 ) | 0.023<br>(0.0 -0.0 ) | 0.028<br>(0.0 -0.0 ) | 0.026<br>(0.0 -0.0 ) | 0.030<br>(0.0 -0.1 ) | 0.030<br>(0.0 -0.1 ) | 0.99  | 0.99 | 0.98 | 0.95 | 0.94  | 0.90  | 0.90    |
| Column Å at 779 nm  | 0.008<br>(0.0 -0.0 ) | 0.011<br>(0.0 -0.0 ) | 0.017<br>(0.0 -0.0 ) | 0.022<br>(0.0 -0.0 ) | 0.020<br>(0.0 -0.0 ) | 0.025<br>(0.0 -0.1 ) | 0.024<br>(0.0 -0.1 ) | 0.99  | 0.99 | 0.98 | 0.95 | 0.93  | 0.89  | 0.88    |
| Column Å at 865 nm  | 0.007<br>(0.0 -0.0 ) | 0.009<br>(0.0 -0.0 ) | 0.014<br>(0.0 -0.0 ) | 0.017<br>(0.0 -0.0 ) | 0.016<br>(0.0 -0.1 ) | 0.021<br>(0.0 -0.1 ) | 0.020<br>(0.0 -0.1 ) | 0.99  | 0.99 | 0.98 | 0.94 | 0.92  | 0.88  | 0.86    |
| Column Å at 1019 nm | 0.005<br>(0.0 -0.0 ) | 0.006<br>(0.0 -0.0 ) | 0.010<br>(0.0 -0.0 ) | 0.012<br>(0.0 -0.0 ) | 0.012<br>(0.0 -0.1 ) | 0.017<br>(0.0 -0.1 ) | 0.016<br>(0.0 -0.1 ) | 1.00  | 0.99 | 0.97 | 0.93 | 0.91  | 0.86  | 0.84    |
| Column Å at 1241 nm | 0.007<br>(0.0 -0.0 ) | 0.007<br>(0.0 -0.0 ) | 0.010<br>(0.0 -0.0 ) | 0.013<br>(0.0 -0.1 ) | 0.014<br>(0.0 -0.1 ) | 0.019<br>(0.0 -0.1 ) | 0.016<br>(0.0 -0.1 ) | 0.99  | 0.99 | 0.96 | 0.92 | 0.89  | 0.85  | 0.82    |
| Column Å at 1559 nm | 0.012<br>(0.0 -0.0 ) | 0.014<br>(0.0 -0.0 ) | 0.018<br>(0.0 -0.0 ) | 0.022<br>(0.0 -0.1 ) | 0.023<br>(0.0 -0.1 ) | 0.027<br>(0.0 -0.1 ) | 0.026<br>(0.0 -0.1 ) | 0.99  | 0.98 | 0.95 | 0.92 | 0.88  | 0.83  | 0.79    |
| Column Å at 2139 nm | 0.018<br>(0.0 -0.1 ) | 0.023<br>(0.0 -0.1 ) | 0.032<br>(0.0 -0.1 ) | 0.037<br>(0.0 -0.1 ) | 0.039<br>(0.0 -0.1 ) | 0.043<br>(0.0 -0.1 ) | 0.040<br>(0.0 -0.1 ) | 0.98  | 0.97 | 0.94 | 0.91 | 0.86  | 0.82  | 0.77    |

| Canada              | <i>std<sub>rel</sub></i> or <i>std</i> |                      |                      |                       |                       |                       |                       | <i>r</i> |      |      |      |       |       |         |
|---------------------|----------------------------------------|----------------------|----------------------|-----------------------|-----------------------|-----------------------|-----------------------|----------|------|------|------|-------|-------|---------|
|                     | cons.                                  | 1 km                 | 3 km                 | 6 km                  | 10 km                 | 20 km                 | 35.2 km               | cons.    | 1 km | 3 km | 6 km | 10 km | 20 km | 35.2 km |
| AOD at 354 nm       | 1.7%<br>(0.3%-9.9 %)                   | 2.4%<br>(0.5%-11.9%) | 4.5%<br>(0.9%-21.5%) | 8.1%<br>(1.3%-36.1%)  | 13.8%<br>(2.0%-50.6%) | 16.4%<br>(2.3%-67.5%) | 17.7%<br>(2.7%-82.2%) | 0.98     | 0.95 | 0.85 | 0.73 | 0.60  | 0.37  | 0.31    |
| AOD at 380 nm       | 1.7%<br>(0.3%-10.0%)                   | 2.3%<br>(0.5%-12.0%) | 4.4%<br>(0.9%-21.7%) | 8.2%<br>(1.3%-36.1%)  | 14.0%<br>(2.0%-50.4%) | 16.8%<br>(2.3%-65.9%) | 17.7%<br>(2.7%-80.3%) | 0.98     | 0.95 | 0.84 | 0.72 | 0.59  | 0.37  | 0.31    |
| AOD at 451 nm       | 1.8%<br>(0.3%-10.4%)                   | 2.4%<br>(0.5%-12.4%) | 4.7%<br>(0.9%-22.4%) | 8.6%<br>(1.3%-36.4%)  | 15.3%<br>(2.1%-50.3%) | 17.9%<br>(2.4%-65.0%) | 19.0%<br>(2.8%-81.5%) | 0.98     | 0.94 | 0.83 | 0.71 | 0.58  | 0.36  | 0.32    |
| AOD at 499 nm       | 2.1%<br>(0.4%-11.2%)                   | 2.8%<br>(0.6%-12.8%) | 5.4%<br>(1.1%-22.8%) | 9.3%<br>(1.5%-37.4%)  | 16.2%<br>(2.4%-50.9%) | 19.3%<br>(2.8%-66.0%) | 20.9%<br>(3.1%-83.3%) | 0.98     | 0.94 | 0.83 | 0.71 | 0.59  | 0.37  | 0.33    |
| AOD at 520 nm       | 1.7%<br>(0.3%-10.7%)                   | 2.4%<br>(0.5%-12.5%) | 4.6%<br>(0.9%-22.4%) | 8.7%<br>(1.4%-36.1%)  | 15.7%<br>(2.0%-49.7%) | 18.7%<br>(2.5%-64.5%) | 19.1%<br>(2.9%-80.7%) | 0.98     | 0.94 | 0.83 | 0.71 | 0.59  | 0.37  | 0.34    |
| AOD at 606 nm       | 1.8%<br>(0.3%-11.2%)                   | 2.5%<br>(0.5%-12.9%) | 4.9%<br>(0.9%-22.4%) | 9.1%<br>(1.4%-36.2%)  | 15.6%<br>(2.1%-49.0%) | 20.5%<br>(2.6%-63.8%) | 21.6%<br>(2.8%-79.0%) | 0.97     | 0.93 | 0.82 | 0.71 | 0.58  | 0.37  | 0.34    |
| AOD at 675 nm       | 2.0%<br>(0.4%-11.1%)                   | 2.6%<br>(0.6%-12.9%) | 5.1%<br>(1.1%-22.5%) | 9.1%<br>(1.6%-35.3%)  | 15.6%<br>(2.4%-47.9%) | 21.3%<br>(2.8%-62.8%) | 22.1%<br>(3.3%-75.7%) | 0.97     | 0.93 | 0.81 | 0.71 | 0.58  | 0.37  | 0.36    |
| AOD at 779 nm       | 2.0%<br>(0.4%-11.4%)                   | 2.6%<br>(0.6%-12.8%) | 5.6%<br>(1.0%-22.4%) | 9.6%<br>(1.4%-35.3%)  | 15.9%<br>(2.2%-47.1%) | 22.5%<br>(2.6%-60.7%) | 23.3%<br>(3.1%-71.2%) | 0.96     | 0.92 | 0.80 | 0.70 | 0.58  | 0.38  | 0.37    |
| AOD at 865 nm       | 1.8%<br>(0.4%-10.9%)                   | 2.4%<br>(0.6%-12.5%) | 5.0%<br>(1.0%-21.8%) | 8.9%<br>(1.3%-34.1%)  | 15.5%<br>(2.0%-44.8%) | 22.1%<br>(2.4%-57.8%) | 22.9%<br>(2.8%-66.5%) | 0.95     | 0.90 | 0.79 | 0.69 | 0.58  | 0.40  | 0.39    |
| AOD at 1019 nm      | 2.0%<br>(0.4%-11.2%)                   | 2.6%<br>(0.6%-12.3%) | 5.4%<br>(1.1%-21.8%) | 9.7%<br>(1.4%-34.3%)  | 16.0%<br>(2.2%-45.0%) | 23.7%<br>(2.5%-56.7%) | 23.2%<br>(3.0%-65.2%) | 0.94     | 0.87 | 0.75 | 0.67 | 0.56  | 0.40  | 0.40    |
| AOD at 1241 nm      | 1.6%<br>(0.3%-10.2%)                   | 2.0%<br>(0.5%-10.4%) | 4.2%<br>(0.8%-19.4%) | 7.4%<br>(1.1%-29.8%)  | 14.5%<br>(1.6%-41.1%) | 19.5%<br>(1.8%-54.0%) | 21.2%<br>(2.1%-57.8%) | 0.90     | 0.81 | 0.67 | 0.59 | 0.49  | 0.36  | 0.35    |
| AOD at 1559 nm      | 3.0%<br>(0.6%-12.2%)                   | 3.6%<br>(1.1%-12.6%) | 6.7%<br>(1.7%-21.0%) | 10.6%<br>(1.9%-30.1%) | 16.1%<br>(2.6%-40.0%) | 21.8%<br>(3.1%-56.1%) | 21.8%<br>(3.5%-56.6%) | 0.86     | 0.73 | 0.57 | 0.49 | 0.42  | 0.35  | 0.33    |
| AOD at 2139 nm      | 2.5%<br>(0.6%-10.8%)                   | 3.0%<br>(0.9%-10.1%) | 5.1%<br>(1.5%-17.8%) | 8.5%<br>(2.0%-29.0%)  | 13.2%<br>(2.7%-40.2%) | 17.9%<br>(3.0%-61.2%) | 20.4%<br>(3.4%-69.1%) | 0.81     | 0.65 | 0.46 | 0.37 | 0.30  | 0.24  | 0.23    |
| Column Å at 354 nm  | 0.013<br>(0.0 -0.1 )                   | 0.015<br>(0.0 -0.1 ) | 0.025<br>(0.0 -0.1 ) | 0.042<br>(0.0 -0.1 )  | 0.063<br>(0.0 -0.2 )  | 0.095<br>(0.0 -0.2 )  | 0.105<br>(0.0 -0.2 )  | 0.98     | 0.96 | 0.93 | 0.89 | 0.85  | 0.71  | 0.64    |
| Column Å at 380 nm  | 0.012<br>(0.0 -0.0 )                   | 0.014<br>(0.0 -0.0 ) | 0.023<br>(0.0 -0.1 ) | 0.041<br>(0.0 -0.1 )  | 0.063<br>(0.0 -0.2 )  | 0.101<br>(0.0 -0.2 )  | 0.099<br>(0.0 -0.2 )  | 0.98     | 0.96 | 0.93 | 0.87 | 0.83  | 0.67  | 0.59    |
| Column Å at 451 nm  | 0.010<br>(0.0 -0.0 )                   | 0.011<br>(0.0 -0.0 ) | 0.020<br>(0.0 -0.1 ) | 0.038<br>(0.0 -0.1 )  | 0.062<br>(0.0 -0.2 )  | 0.094<br>(0.0 -0.2 )  | 0.087<br>(0.0 -0.2 )  | 0.98     | 0.96 | 0.92 | 0.84 | 0.77  | 0.57  | 0.44    |
| Column Å at 499 nm  | 0.008<br>(0.0 -0.0 )                   | 0.011<br>(0.0 -0.0 ) | 0.019<br>(0.0 -0.1 ) | 0.037<br>(0.0 -0.1 )  | 0.062<br>(0.0 -0.2 )  | 0.091<br>(0.0 -0.2 )  | 0.077<br>(0.0 -0.2 )  | 0.98     | 0.96 | 0.92 | 0.83 | 0.75  | 0.52  | 0.37    |
| Column Å at 520 nm  | 0.008<br>(0.0 -0.0 )                   | 0.010<br>(0.0 -0.0 ) | 0.019<br>(0.0 -0.1 ) | 0.037<br>(0.0 -0.1 )  | 0.061<br>(0.0 -0.2 )  | 0.087<br>(0.0 -0.2 )  | 0.074<br>(0.0 -0.3 )  | 0.98     | 0.96 | 0.92 | 0.83 | 0.74  | 0.51  | 0.34    |
| Column Å at 606 nm  | 0.008<br>(0.0 -0.0 )                   | 0.011<br>(0.0 -0.0 ) | 0.018<br>(0.0 -0.1 ) | 0.037<br>(0.0 -0.1 )  | 0.066<br>(0.0 -0.2 )  | 0.090<br>(0.0 -0.2 )  | 0.076<br>(0.0 -0.3 )  | 0.98     | 0.96 | 0.92 | 0.83 | 0.72  | 0.48  | 0.32    |
| Column Å at 675 nm  | 0.009<br>(0.0 -0.0 )                   | 0.011<br>(0.0 -0.0 ) | 0.020<br>(0.0 -0.1 ) | 0.039<br>(0.0 -0.1 )  | 0.068<br>(0.0 -0.2 )  | 0.095<br>(0.0 -0.2 )  | 0.079<br>(0.0 -0.3 )  | 0.98     | 0.96 | 0.92 | 0.83 | 0.72  | 0.49  | 0.35    |
| Column Å at 779 nm  | 0.011<br>(0.0 -0.0 )                   | 0.013<br>(0.0 -0.1 ) | 0.023<br>(0.0 -0.1 ) | 0.045<br>(0.0 -0.2 )  | 0.071<br>(0.0 -0.2 )  | 0.098<br>(0.0 -0.3 )  | 0.080<br>(0.0 -0.3 )  | 0.98     | 0.96 | 0.92 | 0.84 | 0.73  | 0.52  | 0.43    |
| Column Å at 865 nm  | 0.012<br>(0.0 -0.1 )                   | 0.015<br>(0.0 -0.1 ) | 0.025<br>(0.0 -0.1 ) | 0.049<br>(0.0 -0.2 )  | 0.077<br>(0.0 -0.3 )  | 0.105<br>(0.0 -0.3 )  | 0.086<br>(0.0 -0.4 )  | 0.98     | 0.96 | 0.93 | 0.85 | 0.74  | 0.55  | 0.48    |
| Column Å at 1019 nm | 0.015<br>(0.0 -0.1 )                   | 0.019<br>(0.0 -0.1 ) | 0.030<br>(0.0 -0.1 ) | 0.058<br>(0.0 -0.2 )  | 0.089<br>(0.0 -0.3 )  | 0.123<br>(0.0 -0.3 )  | 0.102<br>(0.0 -0.4 )  | 0.98     | 0.96 | 0.93 | 0.86 | 0.76  | 0.59  | 0.56    |
| Column Å at 1241 nm | 0.019<br>(0.0 -0.1 )                   | 0.024<br>(0.0 -0.1 ) | 0.037<br>(0.0 -0.1 ) | 0.069<br>(0.0 -0.2 )  | 0.108<br>(0.0 -0.3 )  | 0.147<br>(0.0 -0.4 )  | 0.126<br>(0.0 -0.4 )  | 0.98     | 0.97 | 0.93 | 0.88 | 0.78  | 0.64  | 0.62    |
| Column Å at 1559 nm | 0.023<br>(0.0 -0.1 )                   | 0.030<br>(0.0 -0.1 ) | 0.047<br>(0.0 -0.2 ) | 0.081<br>(0.0 -0.2 )  | 0.126<br>(0.0 -0.3 )  | 0.170<br>(0.0 -0.4 )  | 0.155<br>(0.0 -0.4 )  | 0.98     | 0.97 | 0.94 | 0.89 | 0.80  | 0.67  | 0.68    |
| Column Å at 2139 nm | 0.029<br>(0.0 -0.1 )                   | 0.037<br>(0.0 -0.1 ) | 0.060<br>(0.0 -0.2 ) | 0.103<br>(0.0 -0.3 )  | 0.154<br>(0.0 -0.4 )  | 0.209<br>(0.0 -0.5 )  | 0.206<br>(0.1 -0.5 )  | 0.98     | 0.97 | 0.94 | 0.90 | 0.82  | 0.71  | 0.72    |

The *std<sub>rel</sub>* and *std* values at the 16th and 84th percentiles are given in the parentheses, below the median value.

Supplementary Table 2. Number of samples that entered the statistics for  $std_{rel,med}$ ,  $std_{med}$  and  $r$  for the Alaska (top table) and Canada (bottom) phases.

| Alaska                    | $std_{med}$ or $std_{rel,med}$ |      |      |      |       |       |         | $r$   |      |      |      |       |       |         |
|---------------------------|--------------------------------|------|------|------|-------|-------|---------|-------|------|------|------|-------|-------|---------|
|                           | cons.                          | 1 km | 3 km | 6 km | 10 km | 20 km | 35.2 km | cons. | 1 km | 3 km | 6 km | 10 km | 20 km | 35.2 km |
| AOD at 354 nm             | 751                            | 554  | 540  | 304  | 235   | 112   | 68      | 751   | 624  | 578  | 345  | 327   | 267   | 158     |
| AOD at 380 nm             | 2750                           | 2257 | 2368 | 1874 | 1054  | 802   | 782     | 2750  | 2402 | 1927 | 1728 | 1402  | 1117  | 770     |
| AOD at 451 nm             | 2750                           | 2257 | 2368 | 1874 | 1054  | 802   | 782     | 2750  | 2402 | 1927 | 1728 | 1402  | 1117  | 770     |
| <b>AOD at 499 nm</b>      | 1626                           | 1388 | 1303 | 988  | 504   | 392   | 382     | 1626  | 1385 | 1102 | 1069 | 796   | 638   | 444     |
| AOD at 520 nm             | 2750                           | 2257 | 2368 | 1874 | 1054  | 802   | 782     | 2750  | 2402 | 1927 | 1728 | 1402  | 1117  | 770     |
| AOD at 606 nm             | 2438                           | 2045 | 2088 | 1652 | 885   | 683   | 702     | 2438  | 2115 | 1695 | 1517 | 1263  | 984   | 677     |
| AOD at 675 nm             | 2105                           | 1798 | 1761 | 1342 | 709   | 539   | 564     | 2105  | 1858 | 1419 | 1340 | 1057  | 845   | 594     |
| AOD at 779 nm             | 2166                           | 1770 | 1838 | 1433 | 795   | 612   | 626     | 2166  | 1910 | 1478 | 1349 | 1157  | 919   | 619     |
| AOD at 865 nm             | 2750                           | 2257 | 2368 | 1874 | 1054  | 802   | 782     | 2750  | 2402 | 1927 | 1728 | 1402  | 1117  | 770     |
| AOD at 1019 nm            | 2750                           | 2257 | 2368 | 1874 | 1054  | 802   | 782     | 2750  | 2402 | 1927 | 1728 | 1402  | 1117  | 770     |
| AOD at 1241 nm            | 1907                           | 1560 | 1587 | 1189 | 693   | 500   | 537     | 1907  | 1654 | 1317 | 1201 | 956   | 776   | 538     |
| AOD at 1559 nm            | 2750                           | 2257 | 2368 | 1874 | 1054  | 802   | 782     | 2750  | 2402 | 1927 | 1728 | 1402  | 1117  | 770     |
| AOD at 2139 nm            | 2750                           | 2257 | 2368 | 1874 | 1054  | 802   | 782     | 2750  | 2402 | 1927 | 1728 | 1402  | 1117  | 770     |
| Column A at 354 nm        | 2750                           | 2257 | 2368 | 1874 | 1054  | 802   | 782     | 2750  | 2402 | 1927 | 1728 | 1402  | 1117  | 770     |
| Column A at 380 nm        | 2750                           | 2257 | 2368 | 1874 | 1054  | 802   | 782     | 2750  | 2402 | 1927 | 1728 | 1402  | 1117  | 770     |
| Column A at 451 nm        | 2750                           | 2257 | 2368 | 1874 | 1054  | 802   | 782     | 2750  | 2402 | 1927 | 1728 | 1402  | 1117  | 770     |
| <b>Column A at 499 nm</b> | 2750                           | 2257 | 2368 | 1874 | 1054  | 802   | 782     | 2750  | 2402 | 1927 | 1728 | 1402  | 1117  | 770     |
| Column A at 520 nm        | 2750                           | 2257 | 2368 | 1874 | 1054  | 802   | 782     | 2750  | 2402 | 1927 | 1728 | 1402  | 1117  | 770     |
| Column A at 606 nm        | 2750                           | 2257 | 2368 | 1874 | 1054  | 802   | 782     | 2750  | 2402 | 1927 | 1728 | 1402  | 1117  | 770     |
| Column A at 675 nm        | 2750                           | 2257 | 2368 | 1874 | 1054  | 802   | 782     | 2750  | 2402 | 1927 | 1728 | 1402  | 1117  | 770     |
| Column A at 779 nm        | 2750                           | 2257 | 2368 | 1874 | 1054  | 802   | 782     | 2750  | 2402 | 1927 | 1728 | 1402  | 1117  | 770     |
| Column A at 865 nm        | 2750                           | 2257 | 2368 | 1874 | 1054  | 802   | 782     | 2750  | 2402 | 1927 | 1728 | 1402  | 1117  | 770     |
| Column A at 1019 nm       | 2750                           | 2257 | 2368 | 1874 | 1054  | 802   | 782     | 2750  | 2402 | 1927 | 1728 | 1402  | 1117  | 770     |
| Column A at 1241 nm       | 2750                           | 2257 | 2368 | 1874 | 1054  | 802   | 782     | 2750  | 2402 | 1927 | 1728 | 1402  | 1117  | 770     |
| Column A at 1559 nm       | 2750                           | 2257 | 2368 | 1874 | 1054  | 802   | 782     | 2750  | 2402 | 1927 | 1728 | 1402  | 1117  | 770     |
| Column A at 2139 nm       | 2750                           | 2257 | 2368 | 1874 | 1054  | 802   | 782     | 2750  | 2402 | 1927 | 1728 | 1402  | 1117  | 770     |
|                           |                                |      |      |      |       |       |         |       |      |      |      |       |       |         |
| Canada                    | $std_{med}$ or $std_{rel,med}$ |      |      |      |       |       |         | $r$   |      |      |      |       |       |         |
|                           | cons.                          | 1 km | 3 km | 6 km | 10 km | 20 km | 35.2 km | cons. | 1 km | 3 km | 6 km | 10 km | 20 km | 35.2 km |
| AOD at 354 nm             | 6064                           | 5376 | 5690 | 4550 | 3682  | 2565  | 1564    | 6064  | 6568 | 5554 | 4671 | 3717  | 2735  | 1681    |
| AOD at 380 nm             | 6064                           | 5376 | 5690 | 4550 | 3682  | 2565  | 1564    | 6064  | 6568 | 5554 | 4671 | 3717  | 2735  | 1681    |
| AOD at 451 nm             | 6064                           | 5376 | 5690 | 4550 | 3682  | 2565  | 1564    | 6064  | 6568 | 5554 | 4671 | 3717  | 2735  | 1681    |
| <b>AOD at 499 nm</b>      | 6064                           | 5376 | 5690 | 4550 | 3682  | 2565  | 1564    | 6064  | 6568 | 5554 | 4671 | 3717  | 2735  | 1681    |
| AOD at 520 nm             | 6064                           | 5376 | 5690 | 4550 | 3682  | 2565  | 1564    | 6064  | 6568 | 5554 | 4671 | 3717  | 2735  | 1681    |
| AOD at 606 nm             | 6064                           | 5376 | 5690 | 4550 | 3682  | 2565  | 1564    | 6064  | 6568 | 5554 | 4671 | 3717  | 2735  | 1681    |
| AOD at 675 nm             | 6064                           | 5376 | 5690 | 4550 | 3682  | 2565  | 1564    | 6064  | 6568 | 5554 | 4671 | 3717  | 2735  | 1681    |
| AOD at 779 nm             | 6064                           | 5376 | 5690 | 4550 | 3682  | 2565  | 1564    | 6064  | 6568 | 5554 | 4671 | 3717  | 2735  | 1681    |
| AOD at 865 nm             | 6064                           | 5376 | 5690 | 4550 | 3682  | 2565  | 1564    | 6064  | 6568 | 5554 | 4671 | 3717  | 2735  | 1681    |
| AOD at 1019 nm            | 6064                           | 5376 | 5690 | 4550 | 3682  | 2565  | 1564    | 6064  | 6568 | 5554 | 4671 | 3717  | 2735  | 1681    |
| AOD at 1241 nm            | 6064                           | 5376 | 5690 | 4550 | 3682  | 2565  | 1564    | 6064  | 6568 | 5554 | 4671 | 3717  | 2735  | 1681    |
| AOD at 1559 nm            | 6064                           | 5376 | 5690 | 4550 | 3682  | 2565  | 1564    | 6064  | 6568 | 5554 | 4671 | 3717  | 2735  | 1681    |
| AOD at 2139 nm            | 6064                           | 5376 | 5690 | 4550 | 3682  | 2565  | 1564    | 6064  | 6568 | 5554 | 4671 | 3717  | 2735  | 1681    |
| Column A at 354 nm        | 6064                           | 5376 | 5690 | 4550 | 3682  | 2565  | 1564    | 6064  | 6568 | 5554 | 4671 | 3717  | 2735  | 1681    |
| Column A at 380 nm        | 6064                           | 5376 | 5690 | 4550 | 3682  | 2565  | 1564    | 6064  | 6568 | 5554 | 4671 | 3717  | 2735  | 1681    |
| Column A at 451 nm        | 6064                           | 5376 | 5690 | 4550 | 3682  | 2565  | 1564    | 6064  | 6568 | 5554 | 4671 | 3717  | 2735  | 1681    |
| <b>Column A at 499 nm</b> | 6064                           | 5376 | 5690 | 4550 | 3682  | 2565  | 1564    | 6064  | 6568 | 5554 | 4671 | 3717  | 2735  | 1681    |
| Column A at 520 nm        | 6064                           | 5376 | 5690 | 4550 | 3682  | 2565  | 1564    | 6064  | 6568 | 5554 | 4671 | 3717  | 2735  | 1681    |
| Column A at 606 nm        | 6064                           | 5376 | 5690 | 4550 | 3682  | 2565  | 1564    | 6064  | 6568 | 5554 | 4671 | 3717  | 2735  | 1681    |
| Column A at 675 nm        | 6064                           | 5376 | 5690 | 4550 | 3682  | 2565  | 1564    | 6064  | 6568 | 5554 | 4671 | 3717  | 2735  | 1681    |
| Column A at 779 nm        | 6064                           | 5376 | 5690 | 4550 | 3682  | 2565  | 1564    | 6064  | 6568 | 5554 | 4671 | 3717  | 2735  | 1681    |
| Column A at 865 nm        | 6064                           | 5376 | 5690 | 4550 | 3682  | 2565  | 1564    | 6064  | 6568 | 5554 | 4671 | 3717  | 2735  | 1681    |
| Column A at 1019 nm       | 6064                           | 5376 | 5690 | 4550 | 3682  | 2565  | 1564    | 6064  | 6568 | 5554 | 4671 | 3717  | 2735  | 1681    |
| Column A at 1241 nm       | 6064                           | 5376 | 5690 | 4550 | 3682  | 2565  | 1564    | 6064  | 6568 | 5554 | 4671 | 3717  | 2735  | 1681    |
| Column A at 1559 nm       | 6064                           | 5376 | 5690 | 4550 | 3682  | 2565  | 1564    | 6064  | 6568 | 5554 | 4671 | 3717  | 2735  | 1681    |
| Column A at 2139 nm       | 6064                           | 5376 | 5690 | 4550 | 3682  | 2565  | 1564    | 6064  | 6568 | 5554 | 4671 | 3717  | 2735  | 1681    |

The segments identified for  $std_{rel}$  and  $std$  are slightly different from those for  $r$  for two reasons. The former includes the entire 3-second sampling time, while the latter is measured between the mid points of the two measurements. To avoid bias due to data gaps, we only calculate  $std$  and  $std_{rel}$  for segments that have at least half of the potential maximum number of data points.
