# Supplementary material for: Horizontal variability of aerosol optical depth observed during the ARCTAS airborne experiment
Source: Copernicus journal article supplement (doi:10.5194/acp-11-8489-2011), 2011-08-19
Supplement: Supplementary file 2 [file acp-11-8489-2011-supplement.zip]

Archive with 2 entries (2 files):
- SupplementaryTables_dataat13wavelengths_SN.pdf
- Appendix_conversion_math.pdf
